# Supplementary material for: Synthesis and Crystal Structure of the Zintl Phases NaSrSb, NaBaSb and NaEuSb
Source: MDPI journal article supplement (doi:10.3390/ma16041428), 2023-02-08
Supplement: s1 [file s1]

# Synthesis and Crystal Structure of the Zintl Phases NaSrSb, NaBaSb and NaEuSb

Yi Wang and Svilen Bobev \*

Department of Chemistry and Biochemistry, University of Delaware, Newark, DE 19716, USA

\* Correspondence: bobev@udel.edu

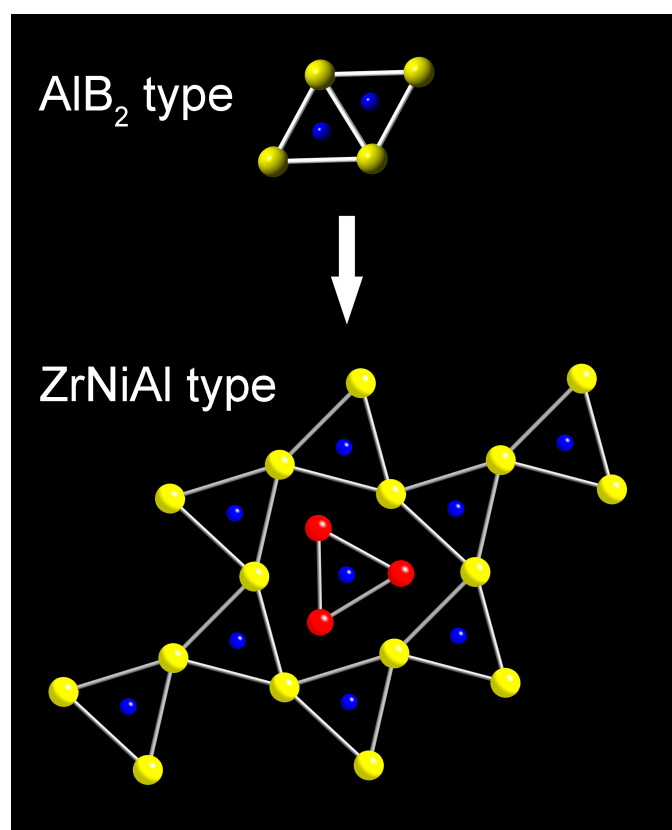

**Figure S1.** The hexagonal crystal structure of  $\text{AlB}_2$ , and the hexagonal crystal structure of  $\text{ZrNiAl}$ , both projected down the  $c$ -axis. The representation emphasizes the trigonal prisms having metal atoms at the corners and B atoms ( $\text{AlB}_2$ ) and Al atoms ( $\text{ZrNiAl}$ ) at the center. The different three-dimensional connectivity of these prisms leads to the two structure types, respectively. For a comprehensive overview of the relationships between  $\text{AlB}_2$ -related intermetallic compounds, the reader is referred to the following review article: Hoffmann, R-D.; Pöttgen, R.  $\text{AlB}_2$ -related intermetallic compounds—a comprehensive view based on group-subgroup relations. *Z. Kristallogr.* **2001**, *216*, 127–145.

**Table S1.** Some known equiatomic compounds formed between the alkali metals (A), the alkaline-earth metals (AE), and the group 15 elements P, As, Sb, Bi, (*Pn*).

| Compound                                | Structure Type             | Space Group               | Pearson Symbol | Ref.    |
|-----------------------------------------|----------------------------|---------------------------|----------------|---------|
| LiBeP                                   | PbClF (Cu <sub>2</sub> Sb) | <i>P4/nmm</i>             | <i>tP6</i>     | [1]     |
| LiBeAs                                  | PbClF (Cu <sub>2</sub> Sb) | <i>P4/nmm</i>             | <i>tP6</i>     | [2]     |
| NaMgAs                                  | PbClF (Cu <sub>2</sub> Sb) | <i>P4/nmm</i>             | <i>tP6</i>     | [3]     |
| NaMgSb                                  | PbClF (Cu <sub>2</sub> Sb) | <i>P4/nmm</i>             | <i>tP6</i>     | [3]     |
| NaMgBi                                  | PbClF (Cu <sub>2</sub> Sb) | <i>P4/nmm</i>             | <i>tP6</i>     | [4]     |
| KMgP                                    | PbClF (Cu <sub>2</sub> Sb) | <i>P4/nmm</i>             | <i>tP6</i>     | [5]     |
| KMgAs                                   | PbClF (Cu <sub>2</sub> Sb) | <i>P4/nmm</i>             | <i>tP6</i>     | [5]     |
| KMgSb                                   | PbClF (Cu <sub>2</sub> Sb) | <i>P4/nmm</i>             | <i>tP6</i>     | [5]     |
| KMgBi                                   | PbClF (Cu <sub>2</sub> Sb) | <i>P4/nmm</i>             | <i>tP6</i>     | [5]     |
| KCaBi                                   | PbClF (Cu <sub>2</sub> Sb) | <i>P4/nmm</i>             | <i>tP6</i>     | [6]     |
| RbCaAs                                  | PbClF (Cu <sub>2</sub> Sb) | <i>P4/nmm</i>             | <i>tP6</i>     | [7]     |
| RbCaSb                                  | PbClF (Cu <sub>2</sub> Sb) | <i>P4/nmm</i>             | <i>tP6</i>     | [7]     |
| LiMgP                                   | LiAlSi (half-Heusler)      | <i>F</i> $\bar{4}3m$      | <i>cF12</i>    | [1]     |
| LiMgAs                                  | LiAlSi (half-Heusler)      | <i>F</i> $\bar{4}3m$      | <i>cF12</i>    | [8]     |
| LiMgBi                                  | LiAlSi (half-Heusler)      | <i>F</i> $\bar{4}3m$      | <i>cF12</i>    | [8]     |
| LiSrP *                                 | LiBaSi                     | <i>P</i> $\bar{6}m2$      | <i>hP3</i>     | [9]     |
| LiBaP *                                 | LiBaSi                     | <i>P</i> $\bar{6}m2$      | <i>hP3</i>     | [9]     |
| LiBaAs                                  | LiBaSi                     | <i>P</i> $\bar{6}m2$      | <i>hP3</i>     | [9]     |
| LiBeSb                                  | LiGaGe                     | <i>P6<sub>3</sub>mc</i>   | <i>hP6</i>     | [10]    |
| NaBeAs                                  | ZrBeSi (KZnP)              | <i>P6<sub>3</sub>/mmc</i> | <i>hP6</i>     | [11]    |
| NaBeSb                                  | ZrBeSi (KZnP)              | <i>P6<sub>3</sub>/mmc</i> | <i>hP6</i>     | [11]    |
| LiSrP *                                 | ZrBeSi (KZnP)              | <i>P6<sub>3</sub>/mmc</i> | <i>hP6</i>     | [12]    |
| LiBaP *                                 | ZrBeSi (KZnP)              | <i>P6<sub>3</sub>/mmc</i> | <i>hP6</i>     | [12]    |
| LiBaSb                                  | ZrBeSi (KZnP)              | <i>P6<sub>3</sub>/mmc</i> | <i>hP6</i>     | [13]    |
| CaLiAs                                  | TiNiSi (SrMgSi)            | <i>Pnma</i>               | <i>oP12</i>    | [14,15] |
| CaLiSb                                  | TiNiSi (SrMgSi)            | <i>Pnma</i>               | <i>oP12</i>    | [14,15] |
| CaLiBi                                  | TiNiSi (SrMgSi)            | <i>Pnma</i>               | <i>oP12</i>    | [14,15] |
| SrLiAs                                  | TiNiSi (SrMgSi)            | <i>Pnma</i>               | <i>oP12</i>    | [16]    |
| SrLiSb                                  | TiNiSi (SrMgSi)            | <i>Pnma</i>               | <i>oP12</i>    | [14,17] |
| SrLiBi                                  | TiNiSi (SrMgSi)            | <i>Pnma</i>               | <i>oP12</i>    | [14]    |
| NaSrP                                   | ZrNiAl (Fe <sub>2</sub> P) | <i>P</i> $\bar{6}2m$      | <i>hP9</i>     | [12]    |
| NaSrAs                                  | ZrNiAl (Fe <sub>2</sub> P) | <i>P</i> $\bar{6}2m$      | <i>hP9</i>     | [18]    |
| NaBaP                                   | ZrNiAl (Fe <sub>2</sub> P) | <i>P</i> $\bar{6}2m$      | <i>hP9</i>     | [19]    |
| NaBaBi                                  | ZrNiAl (Fe <sub>2</sub> P) | <i>P</i> $\bar{6}2m$      | <i>hP9</i>     | [20]    |
| SrLi <sub>0.95</sub> As <sub>0.98</sub> | -                          | <i>P6<sub>3</sub>/mmc</i> | -              | [16]    |

\* contradicting structure determinations.

## References

1. El Maslout, A.; Motte, J.P.; Gleitzer, C.; Aubry, J. Preparation et proprietes d'un nouveau compose dans la serie LiMP: le phosphure de lithium-cadmium LiCdP. *Comptes Rendus Des Seances De L'academie Des Sci. Ser. C: Sci. Chim.* **1971**, *273*, 707–710.
2. Tiburtius, C.; Schuster, H.U. LiBeSb und LiZnBi, ternare Verbindungen mit Wurtzitgeruest. *Z. Naturforsch.* **1978**, *33b*, 35–38.
3. Krenkel, B.; Schuster, H.U. NaMgAs(Sb)—Ternare Verbindungen mit modifizierter Cu<sub>2</sub>Sb-Struktur. *Z. Naturforsch.* **1978**, *33b*, 1080–1082.
4. Yamada, T.; Matsuo, N.; Enoki, M.; Yamane, H. A novel ternary bismuthide, NaMgBi: crystal and electronic structure and electrical properties. *Z. Naturforsch.* **2021**, *76b*, 789–795.
5. Vogel, R.; Schuster, H.U. Neue elektrovalente ternare Verbindungen des Kaliums mit Magnesium und Elementen der 5 Hauptgruppe. *Z. Naturforsch.* **1979**, *34b*, 1719–1721.

6. Hirt, H.; Deiseroth, H.J. Crystal structure of potassium calcium bismuthide KCaBi. *Z. Kristallogr. NCS* **2003**, *218*, 191.
7. Cardoso, G.; Caroca-Canales, N.; Hönl, W.; von Schnering, H.-G. Crystal structure of rubidium calcium arsenide, RbCaAs, and rubidium calcium antimonide, RbCaSb. *Z. Kristallogr. NCS* **2003**, *218*, 455–456.
8. Nowotny, H.M.; Holub, F. Untersuchungen an metallischen Systemen mit Flussspatphasen. *Monatsh. Chem.* **1960**, *91*, 877–887.
9. Albering, J.H.; Ebel, T.; Jeitschko, W. Präparation, Kristallstruktur und magnetische Eigenschaften der Verbindungen LiAX (A = Ca, Sr, Ba, Eu, Yb; X = P, As, Sb, Bi). *Z. Kristallogr. Supple. Issue* **1997**, *12*, 242.
10. Tiburtius, C.; Schuster, H.U. LiBeSb und LiZnBi, ternäre Verbindungen mit Wurtzitgerüst. *Z. Naturforsch.* **1978**, *33b*, 35–38.
11. Tiburtius, C.; Schuster, H.U. NaBeAs(Sb) – ternäre Phasen im 'aufgefüllten' NiAs (Ni<sub>2</sub>In)-Typ. *Z. Naturforsch.* **1978**, *32b*, 1133–1138.
12. Dong, Y. K.; DiSalvo, F.J. Synthesis and single crystal structures of ternary phosphides Li<sub>4</sub>SrP<sub>2</sub> and AAeP (A = Li, Na; Ae = Sr, Ba). *J. Solid State Chem.* **2007**, *180*, 432–439.
13. Monconduit, L.; Belin, C. A new ternary antimonide phase, LiBaSb. *Acta Cryst. E.* **2001**, *57*, 17–18.
14. Eisenmann, B.; Liebrich, O.; Schäfer, H.; Weiss, A. Darstellung und Kristallstruktur von CaLiSb (Ternäre E-Phasen von Hauptgruppenelementen II). *Z. Naturforsch.* **1969**, *24b*, 1344–1345.
15. Schäfer, M. C.; Suen, N.-T.; Bobev, S. Synthesis and crystal chemistry of new ternary pnictides containing lithium—adding structural complexity one step at a time. *Dalton Trans.* **2014**, *43*, 1688.
16. Feng, X.J.; Prots, Y.; Schmidt, M. P.; Hoffmann, S.; Schnelle, W.; Burkhardt, U.; Zhao, J.-T.; Grin, Y. Synthesis, structure, and properties of two Zintl phases around the composition SrLiAs. *Inorg. Chem.* **2013**, *52*, 8971–8978.
17. Gupta, S.; Ganguli, A.K. Synthesis, structure and properties of a new Zintl phase: SrLiSb. *J. Solid State Chem.* **2006**, *179*, 1318–1322.
18. Carrillo Cabrera, W.; Somer, M.; Peters, E.M.; Peters, K.; von Schnering, H.-G. Crystal structure of sodium strontium arsenide, NaSrAs. *Z. Kristallogr.* **1997**, *212*, 252.
19. Carrillo Cabrera, W.; Somer, M.; Peters, E.M.; Peters, K.; von Schnering, H.-G. Crystal structure of sodium barium phosphide, NaBaP. *Z. Kristallogr.* **1997**, *212*, 191.
20. Hirt, H.; Deiseroth, H.J. The new polar intermetallic compound NaBaBi. *Z. Anorg. Allg. Chem.* **2004**, *630*, 1357–1359.

**Disclaimer/Publisher's Note:** The statements, opinions and data contained in all publications are solely those of the individual author(s) and contributor(s) and not of MDPI and/or the editor(s). MDPI and/or the editor(s) disclaim responsibility for any injury to people or property resulting from any ideas, methods, instructions or products referred to in the content.
